# Supplementary material
Source: Springer Nature journal article supplement (https://www.springermedizin.de/resource/supplementary/12936_2014_3326_MOESM10_ESM.pdf/9545666)
Supplement: MOESM10 [file 9545666]

|     |     |     |     |      |     |     |     |     |
|-----|-----|-----|-----|------|-----|-----|-----|-----|
| 4.1 | 0.4 | 0.7 | 5.2 | 12.4 | 0.8 | 1.6 | 1.3 | 5.9 |
|-----|-----|-----|-----|------|-----|-----|-----|-----|

|     |     |     |
|-----|-----|-----|
| 0.0 | 0.0 | 0.0 |
| 0.7 | 0.0 | 0.4 |
| 9.7 | 5.3 | 7.0 |

55.0
